# Supplementary material for: Polycystic Ovary Syndrome and Gut Microbiota: Phenotype Matters
Source: MDPI journal article supplement (doi:10.3390/life13010007), 2022-12-20
Supplement: s1 [file s1]

Table S2. Sociodemographic characteristics of study participants.

| Parameter                                  | n=184           |
|--------------------------------------------|-----------------|
| Age. years. M±SD                           | 33.18±6.14      |
| Race. n/N (%)                              |                 |
| Caucasians                                 | 133/184 (72.28) |
| Asians                                     | 31/184 (16.85)  |
| Mixed race                                 | 20/184 (10.87)  |
| Place of residence. n/N (%)                |                 |
| city                                       | 108/184 (58.70) |
| village                                    | 76/184 (41.30)  |
| Marital status. n/N (%)                    |                 |
| Single                                     | 55/184 (29.89)  |
| Married                                    | 87/184 (47.28)  |
| Living with another                        | 24/184 (13.04)  |
| Separated                                  | 1/184 (0.54)    |
| Divorced                                   | 15/184 (8.15)   |
| Widowed                                    | 2/184 (1.09)    |
| Would rather not say                       | 0/184 (0.00)    |
| Occupation. n/N (%)                        |                 |
| Legislators senior officials and managers  | 4/184 (2.17)    |
| Professionals                              | 81/184 (44.02)  |
| Technicians and associate professionals    | 31/184 (16.85)  |
| Office clerks                              | 31/184 (16.85)  |
| Service workers and shop and market sales  | 14/184 (7.61)   |
| Skilled agricultural and fishery workers   | 2/184 (1.09)    |
| Craft and related trades workers           | 9/184 (4.89)    |
| Plant and machine operators and assemblers | 3/184 (1.63)    |
| Elementary occupations                     | 7/184 (3.80)    |
| Armed forces                               | 2/184 (1.09)    |
| Education. n/N (%)                         |                 |
| Doctoral degree                            | 16/184 (8.70)   |
| Master's degree                            | 123/184 (66.85) |
| Incomplete High school                     | 8/184 (4.35)    |
| Bachelor's degree                          | 30/184 (16.30)  |
| Some college                               | 0/184 (0.00)    |
| High school equivalent                     | 5/184 (2.72)    |
| Middle school                              | 1/184 (0.54)    |
| No degree                                  | 1/184 (0.54)    |
