# Supplementary material for: Polycystic Ovary Syndrome and Gut Microbiota: Phenotype Matters
Source: MDPI journal article supplement (doi:10.3390/life13010007), 2022-12-20
Supplement: s1 [file s1]

Table S1. List of gut microbiome researches in PCOS patients with findings alpha diversity correlations

|      | Reference                | Country | Participants                                                                                                                                                                                      | Studied indexes                               | Sequencing method                                                                | Alpha diversity indexes |                                                        |                          |
|------|--------------------------|---------|---------------------------------------------------------------------------------------------------------------------------------------------------------------------------------------------------|-----------------------------------------------|----------------------------------------------------------------------------------|-------------------------|--------------------------------------------------------|--------------------------|
|      |                          |         |                                                                                                                                                                                                   |                                               |                                                                                  | Observed up<br>in PCOS  | Observed<br>down in PCOS                               | No difference<br>in PCOS |
| [7]  | Lindheim et al.,<br>2017 | Austria | PCOS, n = 24<br>Control, n = 19                                                                                                                                                                   | OTUs, Faith<br>phylogenetic<br>diversity      | Amplicon sequencing<br>(V1-V2 regions)                                           |                         | Faith's<br>phylogenetic<br>diversity<br>observed OTUs  |                          |
| [8]  | Liu et al., 2017         | China   | PCOS, n = 33: obese PCOS, n = 21;<br>non-obese PCOS, n = 12<br>Control, n = 15: obese control, n =<br>6; non-obese control, n = 9                                                                 | OTUs, Shannon,<br>Simpson, Chao               | Amplicon sequencing<br>(V3-V4 regions)                                           |                         | OTUs<br>Chao                                           | Shannon<br>Simpson       |
| [9]  | Insenser et al.,<br>2018 | Spain   | PCOS, n = 15: obese PCOS, n = 8;<br>non-obese PCOS, n = 7<br>Control, n = 16: obese control, n =<br>8; non-obese control, n = 8<br>Healthy men, n = 15: Obese men,<br>n = 7; Non-obese men, n = 8 | OTUs, Shannon,<br>Chao, Jaccard,<br>Sorensen  | Amplicon sequencing<br>(V4 region)                                               | Shannon                 | Chao                                                   | Jaccard,<br>Sorensen     |
| [10] | Torres et al.,<br>2018   | Poland  | PCOS, n = 73<br>PCOM, n = 42<br>Control, n = 48                                                                                                                                                   | observed SVs,<br>Faith PD,<br>Shannon, Pielou | Amplicon sequencing<br>(V4 regions)                                              |                         | observed SVs<br>Faith PD<br>Shannon<br>evenness of SVs |                          |
| [11] | Qi et al., 2019          | China   | PCOS, n = 50<br>Control, n = 43                                                                                                                                                                   | Shannon                                       | Amplicon sequencing<br>(V3-V4 regions)<br>Whole metagenome<br>shotgun sequencing |                         |                                                        | Shannon                  |
| [12] | Zeng et al.,<br>2019     | China   | PCOS, n = 17: IR-PCOS, n = 9;<br>Non-IR-PCOS, n = 8<br>Control, n = 8                                                                                                                             | observed OTUs,<br>Shannon                     | Amplicon sequencing<br>(V3-V4 regions)                                           |                         | observed OTUs<br>Shannon                               |                          |
| [13] | Zhang et al.,<br>2019    | China   | PCOS, n = 38<br>Control, n = 26 <sup>1</sup>                                                                                                                                                      | Not used                                      | Amplicon sequencing<br>(V3-V4 regions)                                           |                         |                                                        |                          |
| [14] | Chu et al., 2020         | China   | PCOS, n = 14<br>Control, n = 14                                                                                                                                                                   | Not used                                      | Whole metagenome<br>shotgun sequencing                                           |                         |                                                        |                          |

|      |                             |         |                                                                                                                                     |                                                                        |                                                      |                      |                                                   |                               |
|------|-----------------------------|---------|-------------------------------------------------------------------------------------------------------------------------------------|------------------------------------------------------------------------|------------------------------------------------------|----------------------|---------------------------------------------------|-------------------------------|
| [15] | Eyupoglu et al., 2020       | Turkey  | Obese PCOS, n = 17<br>Obese Control, n = 15                                                                                         | OTUs, Faith PD,<br>Pielou, Jaccard,<br>Shannon                         | Amplicon sequencing<br>(V3-V4 regions)               |                      | Observed<br>OTUs                                  | Faith PD<br>Pielou<br>Shannon |
| [16] | Haudum et al., 2020         | Austria | PCOS, n = 24<br>Control, n = 20 <sup>2</sup>                                                                                        | OTUs, Faith PD,<br>Shannon                                             | Amplicon sequencing<br>(V1-V2 regions)               |                      | Shannon<br>Faith PD                               |                               |
| [17] | Jobira et al., 2020         | USA     | PCOS, n = 37<br>Control, n = 21 <sup>3</sup>                                                                                        | OTUs, Shannon<br>diversity,<br>Shannon<br>evenness, richness<br>(Sobs) | Amplicon sequencing<br>(V3-V4 regions)               |                      | OTU, Shannon<br>diversity,<br>Shannon<br>evenness | richness (Sobs)               |
| [18] | Liang et al., 2020          | China   | PCOS, n = 27: obese PCOS, n = 8;<br>non-obese PCOS, n = 10<br>Control, n = 9                                                        | OTUs, Chao,<br>Shannon                                                 | Amplicon sequencing<br>(V3-V4 regions)               |                      | observed SVs<br>Chao<br>Shannon                   |                               |
| [19] | Zhou et al., 2020a          | China   | PCOS, n = 60: obese PCOS, n = 30;<br>non-obese PCOS, n = 30<br>Control, n = 41: obese control, n = 11;<br>non-obese control, n = 30 | OTUs, Sobs,<br>Chao, ACE,<br>Simpson,<br>Shannon                       | Amplicon sequencing<br>(V3-V4 regions)               | Simpson              | Sobs<br>Chao<br>ACE                               | Shannon                       |
| [20] | Zhou et al., 2020b          | China   | PCOS with obesity, n = 18<br>Control with obesity, n = 15                                                                           | OTUs, Shannon,<br>Sobs, ACE                                            | Amplicon sequencing<br>(V1-V2 regions)               |                      | Sobs<br>Shannon                                   | ACE                           |
| [21] | Dong et al., 2021           | China   | PCOS, n = 45: obese PCOS, n = 31;<br>non-obese PCOS, n = 14<br>Control, n = 37: obese control, n = 12;<br>non-obese control, n = 25 | Shannon                                                                | 16S rDNA full-length<br>assembly meta-<br>sequencing |                      | Shannon                                           |                               |
| [22] | Garcia-Beltran et al., 2021 | Spain   | PCOS, n = 23<br>Control, n = 31 <sup>3, 4</sup>                                                                                     | ASVs, Pielou's<br>Evenness,<br>Shannon                                 | Amplicon sequencing<br>(V3-V4 regions)               |                      | Pielou's<br>Evenness<br>Shannon's                 | ASVs                          |
| [23] | He et al., 2021             | China   | non-obese PCOS, n = 26: NIR-<br>PCOS, n = 10; IR-PCOS, n = 14<br>Control, n = 12                                                    | Chao, Observed<br>OTUs                                                 | Amplicon sequencing<br>(V3-V4 regions)               |                      | observed OTUs<br>Chao                             |                               |
| [24] | Jobira et al., 2021         | USA     | PCOS, n = 34: PCOS with Hepatic<br>Steatosis, n = 17;<br>PCOS without Hepatic Steatosis,<br>n = 17                                  | OTUs, Shannon<br>diversity,<br>Shannon<br>evenness, richness<br>(Sobs) | Amplicon sequencing<br>(V3-V4 regions)               | Shannon<br>diversity | Shannon<br>evenness<br>richness (Sobs)            |                               |

|      |                        |        |                                                                                                                                                  |                                                      |                                     |                                                 |                                                                                                 |
|------|------------------------|--------|--------------------------------------------------------------------------------------------------------------------------------------------------|------------------------------------------------------|-------------------------------------|-------------------------------------------------|-------------------------------------------------------------------------------------------------|
| [25] | Liang et al., 2021     | China  | PCOS, n = 20: Lean PCOS, n = 10; Overweight PCOS, n = 10<br>Control, n = 20: Lean control, n = 10; Overweight control, n = 10                    | OTUs, Sobs, Chao, ACE, Shannon                       | Amplicon sequencing (V4 region)     | observed OTUs<br>Sobs<br>Chao<br>Ace<br>Shannon |                                                                                                 |
| [26] | Mammadova et al., 2021 | Turkey | PCOS, phenotype A, n = 24<br>Control, n = 22                                                                                                     | OTUs, Shannon, Chao                                  | Amplicon sequencing (V3-V4 regions) |                                                 | Shannon<br>Simpson<br>Chao<br>Faith's PD<br>observed OTUs<br>Sobs<br>Chao<br>Shannon<br>Simpson |
| [27] | Ni et al., 2021        | China  | Obese PCOS with spleen deficiency, n = 15 <sup>5</sup>                                                                                           | Sobs, Chao, Shannon, Simpson                         | Amplicon sequencing (V3-V4 regions) |                                                 |                                                                                                 |
| [28] | Zhu et al., 2021       | China  | PCOS, n = 54: high LDLC PCOS, n = 16; low LDLC PCOS, n = 38<br>Control, n = 33: high LDLC Control, n = 15; low LDLC Control, n = Control, n = 18 | OTUs, Shannon                                        | Amplicon sequencing (V3-V4 regions) | Shannon                                         |                                                                                                 |
| [29] | Hassan et al., 2022    | India  | PCOS, n = 20<br>Control, n = 20 <sup>6</sup>                                                                                                     | OTUs, Shannon                                        | Amplicon sequencing (V3-V4 regions) | Shannon                                         |                                                                                                 |
| [30] | Li et al., 2022        | China  | PCOS, n = 31: PCOSF group, N = 12; PCOST group, N = 19<br>Control, n = 27                                                                        | ACE, Chao, Shannon, Simpson                          | Amplicon sequencing (V3-V4 regions) |                                                 | ACE<br>Chao<br>Shannon<br>Simpson                                                               |
| [31] | Tayachew et al., 2022  | USA    | Obese PCOS, n = 29: case – oral contraceptive use, n = 8; control – no treatment for PCOS, n = 21 <sup>3</sup>                                   | Shannon diversity, Shannon evenness, richness (Sobs) | Amplicon sequencing (V3-V4 regions) |                                                 | Shannon<br>diversity<br>Shannon<br>evenness<br>richness (Sobs)                                  |
| [32] | Wang et al., 2022a     | China  | PCOS, n = 25: W group – PCOS with WTP diet, n = 14; A group –                                                                                    | observed ASVs, Shannon                               | Amplicon sequencing (V3-V4 regions) | observed ASVs<br>Shannon                        |                                                                                                 |

|      |                   |         |                                             |                                  |                                        |                                     |
|------|-------------------|---------|---------------------------------------------|----------------------------------|----------------------------------------|-------------------------------------|
|      |                   |         | PCOS with WTP diet and<br>acarbose, n = 11  |                                  |                                        |                                     |
| [33] | Lüll et al., 2021 | Finland | PCOS, n = 102;<br>non-PCOS control, n = 202 | ASV, Shannon,<br>Inverse Simpson | Amplicon sequencing<br>(V3-V4 regions) | ASV, Shannon,<br>Inverse<br>Simpson |

Additional information on an interventional experimental protocol or on research with adolescent girls and college and school students:

<sup>1</sup> this study is a two phase experiment in which in the first stage, an imbalance in the intestinal microbiota of the patients with PCOS was studied; whereas on the second stage, the impact of the probiotic *Bifidobacterium lactis* V9 on the intestinal microbiome, gut-brain mediators, and sex hormones of 14 patients with PCOS was monitored;

<sup>2</sup> this study aimed to explore clinical and biochemical parameters, urine isoflavone levels in PCOS and control women before and three days after a defined isoflavone intervention via soy milk;

<sup>3</sup> Adolescent girls;

<sup>4</sup> this study hypothesized that the composition of the gut microbiota in adolescent girls with PCOS and without obesity will differ from that in control girls and will have a dissimilar pattern after a low-dose combination of one mixed anti-androgen and antimineralocorticoid (spironolactone), and two insulin sensitizers (pioglitazone and metformin) or oral contraceptive administration;

<sup>5</sup> this study aimed to explore gut microbiota and fecal metabolite alterations in such patients treated with BZYQ (Buzhong Yiqi);

<sup>6</sup> Women were recruited during regional PCOS screening of college and school students in different schools and colleges in Kashmir, North India.

Abbreviation:

PCOS – polycystic ovary syndrome; OTU – Operational Taxonomic Unit; PCOM – polycystic ovarian morphology; SV – sequence variants; Faith PD - Faith phylogenetic diversity; ACE – Abundance-based Coverage Estimator; IR – insulin resistance; ASV – Amplicon sequence variant; BZYQ – Buzhong Yiqi; LDLC – low-density lipoprotein cholesterol; WTP diet – a high-fiber diet, traditional Chinese medicinal foods, and prebiotics.
