# Supplementary material for: Polycystic Ovary Syndrome and Gut Microbiota: Phenotype Matters
Source: MDPI journal article supplement (doi:10.3390/life13010007), 2022-12-20
Supplement: s1 [file s1]

**Table S4.** Alpha diversity indexes calculated for subgroups of patients with a median relative abundance

| Indexes | Non-PCOS<br>n=121       |                              | PCOS<br>n=63                     |                             | p-value*     |       |              |              |       |       |
|---------|-------------------------|------------------------------|----------------------------------|-----------------------------|--------------|-------|--------------|--------------|-------|-------|
|         | Control<br>(1a)<br>n=19 | “Grey zone”<br>(1b)<br>n=102 | Phenotypes A,B,C<br>(2a)<br>n=41 | Phenotype D<br>(2b)<br>n=22 | 1a-1b        | 2a-2b | 1a-2a        | 1a-2b        | 1b-2a | 1b-2b |
| ASV     | 131**<br>[85; 166]      | 113 [91;137]                 | 101<br>[84; 130]                 | 116<br>[93; 131]            | 0.140        | 0.108 | <b>0.045</b> | 0.248        | 0.127 | 0.823 |
| Shannon | 5.96 [5.36; 6.54]       | 5.53 [4.91;6.04]             | 5.23 [4.80; 5.84]                | 5.41 [4.76;5.79]            | <b>0.016</b> | 0.880 | <b>0.003</b> | <b>0.014</b> | 0.203 | 0.357 |
| Simpson | 0.97 [0.94; 0.98]       | 0.95 [0.92;0.97]             | 0.94 [0.92; 0.97]                | 0.94 [0.91; 0.97]           | <b>0.017</b> | 0.971 | <b>0.006</b> | <b>0.017</b> | 0.351 | 0.472 |
| Chao    | 139 [111; 192]          | 116 [99;151]                 | 108<br>[91; 130]                 | 117<br>[96; 148]            | 0.075        | 0.285 | <b>0.010</b> | 0.121        | 0.062 | 0.803 |
| ACE     | 136<br>[99; 173]        | 111 [92;135]                 | 98<br>[90; 127]                  | 114<br>[89; 131]            | 0.070        | 0.333 | <b>0.014</b> | 0.164        | 0.109 | 0.899 |

\* – p-values are significant at p <0.05;

\*\* – data are expressed as median [25% Quartile; 75% Quartile].

Abbreviations: PCOS – polycystic ovary syndrome; ASV – Amplicon sequence variant, ACE – Abundance-based Coverage Estimator.
