# Supplementary material for: Polycystic Ovary Syndrome and Gut Microbiota: Phenotype Matters
Source: Life (Basel). 2022 Dec 20;13(1):7. doi: 10.3390/life13010007 (PMC9861125; doi:10.3390/life13010007)
Supplement: Supplementary file 1 [file life-13-00007-s001.zip › Table S3.xlsx]

## Sheet: Table S3
Table S3. Short statistics of ASV numbers and alpha diversity indexes representing the gut microbial communities richness and diversity
Sample name	Total reads	Filtered reads	Denoised reads	Merged reads	Non-chimeric reads	ASV	Shannon	Simpson	Chao	ACE
B001	46155	40353	38465	28804	19615	167	5.28	0.90	154	152
B002	26388	22926	21330	15449	11860	144	5.73	0.96	131	129
B003	18510	16336	15692	13371	9870	108	5.94	0.97	132	98
B004	16471	14177	12607	9570	8345	129	6.43	0.98	157	141
B005	34377	29678	26889	20031	16441	211	6.99	0.99	246	208
B006	23575	20486	19513	17297	13263	154	6.29	0.98	190	164
B009	29680	25768	25254	22363	18233	76	3.60	0.79	73	74
B010	27487	24189	22963	19364	15267	123	5.07	0.93	130	129
B011	28367	24689	22486	16772	13924	152	6.49	0.98	172	159
B012	24385	20974	19434	13337	9150	121	6.30	0.98	128	122
B013	21492	18839	18189	14878	11282	102	4.76	0.92	101	95
B014	24626	21486	20229	17555	13296	89	4.77	0.93	86	98
B015	16702	14578	14058	11142	8706	78	3.95	0.80	68	70
B016	14417	12676	11935	10035	7823	78	4.90	0.92	111	95
B017	9649	8263	7324	5357	4891	80	5.64	0.97	102	83
B018	12561	10804	9931	7740	6516	101	5.87	0.97	106	99
B019	16300	14171	12888	8524	7013	78	5.23	0.95	95	82
B020	16231	14229	13675	11910	8917	86	5.47	0.97	91	90
B021	14392	12524	11800	9956	7315	82	5.68	0.97	98	80.2394
B024	29015	25200	23252	16961	14604	198	6.99	0.99	229	203
B025	25398	22396	21783	19250	15506	92	4.58	0.90	108	94
B026	18018	15949	15328	13445	10495	75	4.41	0.89	91	79
B027	27141	23810	22338	17576	13771	134	5.93	0.96	141	137
B028	26683	23194	21971	17026	13224	138	5.41	0.91	139	136
B029	29039	25459	23794	19053	15655	166	6.13	0.97	167	151
B030	22103	19762	19146	17291	13338	68	3.78	0.81	68	70
B031	20616	17779	16261	13341	9796	131	6.46	0.98	162	146
B032	22088	19102	17289	12796	11393	142	6.80	0.99	180	159
B034	22721	19534	18206	14663	11955	150	6.07	0.97	156	153
B035	22538	19795	19097	16407	14374	118	4.77	0.90	139	121
B036	13379	11707	10814	8247	6882	94	5.28	0.94	103	92
B037	24421	21386	20072	15554	8655	105	5.51	0.96	121	117
B038	33011	29174	28907	28135	24100	77	3.71	0.87	67	69
B039	18829	16347	15129	11695	8858	112	5.87	0.97	114	116
B040	20251	17401	15982	11876	8463	96	5.52	0.95	108	98
B041	25622	22803	21782	18704	12287	90	5.17	0.95	106	97.2579
B042	31325	27486	26078	21237	15463	152	6.36	0.98	183	163
B044	20028	17470	16597	13800	12576	144	6.46	0.98	175	156
B045	32442	28169	27188	21195	15957	137	5.72	0.96	134	123
B046	19785	17278	16112	14446	13134	122	5.21	0.93	125	109
B047	7783	6855	6375	5138	3377	42	4.91	0.96	43	47
B048	30270	26245	24787	21464	17589	155	6.03	0.97	174	165
B049	17400	15002	13734	10893	8058	106	5.84	0.97	109	105
B050	16415	14292	13009	9620	6516	91	5.90	0.97	99	93
B051	28965	25409	23876	20021	17262	168	5.61	0.90	223	192
B052	27155	23696	22289	18693	13785	163	6.16	0.98	158	158
B053	19114	16508	15315	11695	8586	108	5.67	0.95	133	110
B054	21060	18553	17570	15042	10672	100	5.32	0.95	94	94
B055	29259	25740	24542	21220	16428	138	6.32	0.98	158	144
B056	21774	19122	18501	16436	9875	90	4.70	0.92	89	79
B057	25768	22175	20861	16784	11935	138	5.87	0.97	153	131
B058	25859	22590	21505	18501	11691	80	4.57	0.89	86	73
B059	25564	22263	21340	16305	10984	131	6.04	0.98	113	118
B060	30200	26293	24840	20556	14979	153	6.54	0.98	179	157
B061	23468	20065	18772	14908	10074	116	5.55	0.96	111	104
B062	28314	24850	23856	19418	14090	105	5.15	0.95	111	105
B063	29682	25781	24457	19312	13911	145	6.12	0.97	155	145
B064	26872	23638	22932	20131	11727	85	5.19	0.95	96	89.6054
B066	17333	15049	13782	9298	6460	99	6.30	0.98	115	109
B067	29509	25627	24723	19716	13295	111	5.54	0.97	107	102
B069	28248	24316	22740	17814	14268	143	5.80	0.96	135	129
B070	27176	23297	21720	16397	12586	164	6.42	0.97	181	155
B071	19771	17099	16600	15293	11751	88	3.35	0.67	110	97
B074	30875	26738	25001	20866	13669	120	5.28	0.94	119	127
B076	28775	24922	23109	18035	12079	137	6.17	0.98	146	149
B077	28727	24962	24123	17615	11533	103	4.98	0.94	98	96
B078	25146	21783	20886	19156	12685	101	4.40	0.89	106	104
B080	55785	48489	46713	40459	30638	203	5.56	0.94	208	189
B081	30038	25846	24870	22310	17892	131	4.67	0.87	162	150
B082	24828	21510	20810	17997	10952	70	3.12	0.71	63	68
B083	7277	6291	5885	4956	2952	46	3.93	0.91	30.3333	35.1731
B084	31523	27733	26684	23291	18641	129	5.17	0.92	120	117
B085	22186	19305	18053	13231	10560	135	6.00	0.97	119	118
B086	26955	23656	21671	16037	12762	165	6.92	0.99	192	173
B087	16936	14720	13895	11367	8348	105	5.88	0.96	128	113
B088	48957	42572	40829	32206	20576	216	6.86	0.98	237	234
B089	16211	14071	13001	10350	7772	104	5.80	0.97	110	110
B090	18450	16084	15481	12656	7479	83	4.85	0.94	67	72
B091	26352	22887	21914	17890	11433	116	5.51	0.95	126	117
B092	18652	16214	15269	10946	8386	104	5.99	0.98	116	111
B093	29396	25467	24060	19640	14891	143	5.65	0.95	154	138
B094	26882	23706	23086	20237	13321	70	4.24	0.90	72	66.0958
B097	59272	51537	47879	36307	24404	260	6.72	0.97	300	263
B098	16102	14038	13020	10063	8707	79	4.62	0.90	79	75
B099	20623	17814	16445	13494	9427	65	3.60	0.83	68	62
B100	19784	17125	16437	13175	8097	64	4.79	0.94	71	66
B101	24352	21144	19761	14935	9983	136	6.15	0.97	147	134
B102	29090	25503	24375	19653	13956	122	4.73	0.87	109	116
B103	11456	9951	9364	7851	5121	57	4.35	0.91	72	62
B104	24886	21571	20561	15391	9182	114	6.07	0.98	112	109.353
B105	24557	21338	20711	18191	13553	124	5.92	0.98	116	112.627
B106	28191	24299	23276	19515	17494	176	6.53	0.98	184	166
B107	33362	28971	27866	23883	19612	144	5.35	0.94	152	135
B108	10874	9374	8706	7813	7326	116	6.01	0.97	144	121
B110	17382	15150	14512	12929	11310	151	6.54	0.98	186	155
B111	29462	25609	23538	18349	15162	202	7.16	0.99	230	205
B112	25613	21926	20932	18150	14090	146	6.06	0.97	188	158
B113	18267	15925	15008	12572	9201	84	5.36	0.96	91	90
B114	17033	14837	13851	10877	9483	114	6.18	0.97	157	133
B115	18473	16188	15577	12555	9106	91	5.13	0.93	89	84
B117	14923	12928	12205	9697	7790	91	5.47	0.96	100	83
B118	28209	24661	23235	18100	13981	182	6.68	0.98	204	173
B119	11383	10000	9540	8434	5231	64	4.30	0.88	58	62
B120	36948	32517	31477	26713	19854	176	6.62	0.98	185	178
B121	19485	16901	15754	11596	8420	107	6.19	0.98	123	120
B122	23194	20091	19028	14876	9316	115	5.95	0.97	129	121.234
B123	29947	26026	24924	19952	14226	158	6.33	0.98	171	147
B124	18110	15565	14362	11618	9391	103	5.88	0.97	122	108
B125	27483	24205	22959	18956	13949	141	6.16	0.97	174	145
B126	29040	25554	24138	20247	13027	156	6.26	0.98	169	151
B127	23056	20254	19410	15760	13046	180	6.70	0.98	198	176
B128	29767	25691	25188	22508	14665	88	4.99	0.95	72	79
B129	22710	19779	18833	16425	13406	125	5.43	0.93	136	122
B130	26911	23336	22472	19578	13305	97	4.95	0.94	92	95.0359
B131	23663	20635	19497	16516	12860	116	4.92	0.93	109	105.237
B132	26454	23488	22628	20018	16166	136	5.09	0.88	151	135
B133	25695	22476	21634	17987	13676	120	5.28	0.94	114	116
B134	28307	24449	23763	19877	14623	107	5.25	0.94	112	105
B135	24864	21641	20719	16020	8809	96	5.10	0.95	85	89
B137	17477	15157	14237	10755	8135	113	6.16	0.98	129	106
B138	20951	18011	16622	12949	9671	104	5.85	0.97	124	111
B140	22561	19364	18471	14766	8947	89	5.57	0.96	101	88
B141	22976	19927	19093	15835	11397	113	5.11	0.93	126.5	120.785
B142	31220	27057	25955	22438	16439	91	4.26	0.88	99	85
B144	20735	17825	16819	13685	8856	80	4.93	0.94	87	86
B147	26301	22673	21351	15937	12441	141	6.38	0.98	168	150.289
B148	23967	20601	19697	15999	13568	151	6.20	0.97	166	158
B149	18448	15903	14596	9381	7315	112	6.06	0.98	111	114
B150	28802	24734	23591	20344	16389	149	5.96	0.97	144	133
B151	27473	23739	22423	17622	13991	115	4.82	0.92	118	111
B152	14983	12737	12049	7218	4566	73	5.09	0.95	68	68
B153	24905	21392	20671	16537	13836	135	5.34	0.91	125	116
B154	21655	18589	18125	15378	10945	93	4.74	0.91	77	80
B155	23569	20290	19703	17422	15366	60	3.46	0.81	66	60
C02	26935	23467	22954	21336	16462	77	3.69	0.80	82	77
C03	18575	16094	15801	14660	9786	46	3.24	0.82	40	43
C05	25023	21722	20447	18142	13729	119	4.63	0.88	111	107
C06	25219	22041	21157	19323	15131	115	5.52	0.97	109	103
C09	21490	18673	17659	14771	10796	119	5.89	0.97	128	122
c10	28854	24273	22615	19318	14013	138	4.99	0.88	170	145
c11	28138	24157	22854	20233	16525	163	6.38	0.98	178	171
c13	25560	22229	21037	18315	13380	150	5.95	0.97	148	141
c14	24530	21336	20601	18044	12969	92	4.80	0.94	93	86
c15	18770	16247	14699	11829	8546	97	5.58	0.96	98	103
c17	23253	20401	19865	17635	11514	86	4.76	0.93	77	81
c18	26035	22366	21169	18697	12203	135	5.23	0.94	130	127
c19	25214	21711	20576	16491	12736	126	5.63	0.94	134	126
c21	25009	21711	20792	18044	12366	110	4.91	0.92	112	103
c22	23857	21043	20271	18709	14480	102	4.70	0.91	96	95
c23	10767	9381	8977	7893	4903	61	4.41	0.91	47	54
c24	18799	15929	15068	13205	9088	82	4.31	0.87	109	98
c25	24804	21705	20873	18408	13776	104	5.12	0.94	95	99
c26	26391	22751	21978	19708	12731	105	4.56	0.88	110	104
c27	25607	22094	20517	17509	12270	124	5.79	0.97	125	114
c28	17963	15704	14871	12856	7762	90	4.95	0.94	92	90
c29	27157	23135	22036	19232	11977	93	4.64	0.92	124	100
c30	23526	20593	19650	16724	11859	107	4.86	0.92	108	101
c31	21993	19022	18067	15460	10882	116	5.70	0.96	109	114.397
c32	20192	17349	16192	13521	9111	94	5.56	0.95	110	91
c34	20843	17621	15790	12601	8872	131	6.03	0.97	148.5	131.263
c35	23660	19533	18233	16003	10231	87	5.06	0.93	114	93
c36	21920	19032	18516	17045	11721	70	3.98	0.88	58	60
c39	19249	16430	15652	12841	6851	79	4.45	0.90	64	76
c40	22413	19373	18645	16854	12225	78	4.34	0.85	83	80
c41	23624	20398	19660	17446	10771	103	4.52	0.90	81	89
c42	23957	20633	19582	16746	13101	98	4.30	0.84	101	89
c43	25363	21811	21119	19033	12175	100	4.80	0.92	85	91
c44	15436	13521	12492	10168	7329	93	5.79	0.97	99	92
c45	21883	18783	17546	14973	10855	120	5.57	0.97	120	122
c46	23823	20877	20063	18232	14636	92	4.96	0.93	101	91
c47	16587	14349	13404	11667	9820	84	5.14	0.94	106	94
c48	20694	18173	17166	15304	10550	108	5.39	0.95	121	117
c49	40244	35112	33043	27630	19117	140	5.14	0.92	150	137
c50	68181	58771	57000	52279	33855	202	5.57	0.96	196	197
c51	18641	15853	14537	12600	9647	105	5.50	0.96	109	105
c52	19229	16350	15134	12961	9200	79	4.38	0.91	82	90
c53	21809	18857	18062	15682	10355	87	5.00	0.92	93	85
c54	22381	19386	18432	14716	12267	130	6.11	0.98	121	125
U1	25001	21822	20475	16159	12747	166	6.49	0.98	164	159
U2	22100	18910	16886	12885	10728	120	5.83	0.97	133	127
U3	20527	17645	15905	11848	7721	125	5.98	0.97	118	113.381
U4	21296	17921	16758	14565	9878	73	4.51	0.93	83	75
U5	23506	20483	19518	17036	13733	85	5.26	0.95	111	99
U6	52756	45961	43655	33190	23451	200	5.75	0.92	196	180
